# Supplementary material
Source: MDPI journal article supplement (https://www.mdpi.com/2077-1312/11/8/1583)
Supplement: s1 [file s1 › jmse-2485388-supplementary.pdf]

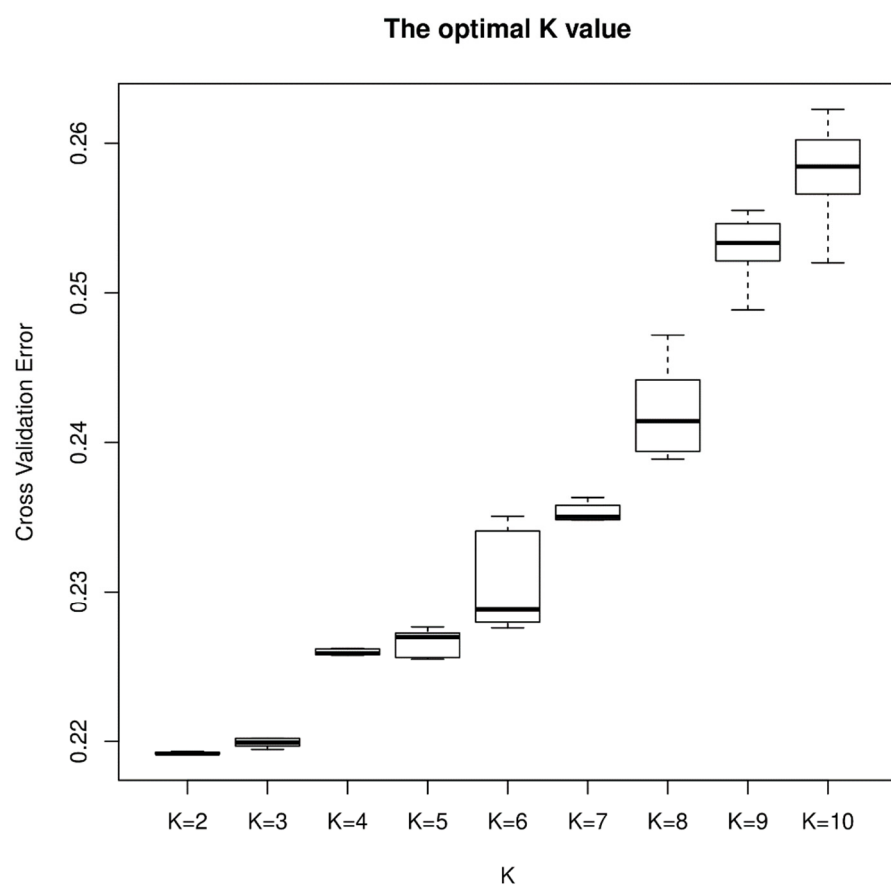

**Figure S1.** Boxplot showing cross-validation error levels for various numbers of subpopulations (K=1–10).
